# Supplementary material
Source: PubMed Central journal article supplement (PMC3957393)
Supplement: amiajnl-2013-001818-s1.pdf [file amiajnl-2013-001818-s1.pdf]

## Appendix A: Chapters and items on the CMR reporting form

|                                               | Items                                                                               | Multiple choices and remarks                                                                                                                                                                                                                                                                                                                                                                                         |
|-----------------------------------------------|-------------------------------------------------------------------------------------|----------------------------------------------------------------------------------------------------------------------------------------------------------------------------------------------------------------------------------------------------------------------------------------------------------------------------------------------------------------------------------------------------------------------|
| <b>Administrative information</b>             |                                                                                     |                                                                                                                                                                                                                                                                                                                                                                                                                      |
|                                               | Identification number of the healthcare practice                                    | -                                                                                                                                                                                                                                                                                                                                                                                                                    |
|                                               | Date of reporting                                                                   | -                                                                                                                                                                                                                                                                                                                                                                                                                    |
|                                               | Date on which the medication event occurred                                         | -                                                                                                                                                                                                                                                                                                                                                                                                                    |
| <b>Data of patient</b>                        |                                                                                     |                                                                                                                                                                                                                                                                                                                                                                                                                      |
|                                               | Year of birth of the patient                                                        | -                                                                                                                                                                                                                                                                                                                                                                                                                    |
|                                               | Sex of the patient                                                                  | <input type="radio"/> Male<br><input type="radio"/> Female                                                                                                                                                                                                                                                                                                                                                           |
| <b>Information about the medication event</b> |                                                                                     |                                                                                                                                                                                                                                                                                                                                                                                                                      |
|                                               | Please describe what happened                                                       | Open ended question                                                                                                                                                                                                                                                                                                                                                                                                  |
|                                               | Which medication was involved?                                                      | -                                                                                                                                                                                                                                                                                                                                                                                                                    |
|                                               | What was the error type                                                             | <input type="radio"/> Prescribing error<br><input type="radio"/> Transcription error<br><input type="radio"/> Assembling the prescription and medication surveillance error<br><input type="radio"/> Compounding error<br><input type="radio"/> Dispensing error<br><input type="radio"/> Administration error<br><input type="radio"/> Patient monitoring error<br><input type="radio"/> Storage and logistic error |
|                                               | Did the medication event take place during a transfer of the patient (shared care)? | <input type="radio"/> Yes, during admission to hospital<br><input type="radio"/> Yes, during discharge of hospital<br><input type="radio"/> Yes, between the wards in one hospital<br><input type="radio"/> Yes, during out-of-hours services in the primary care<br><input type="radio"/> Yes, with the intensive care for thrombotic patients<br><input type="radio"/> Yes, namely:<br><input type="radio"/> No    |
|                                               | What are the causes of the medication event?                                        | <input type="radio"/> Technical<br><input type="radio"/> Organisation<br><input type="radio"/> Behaviour<br><input type="radio"/> Communication<br><input type="radio"/> Patient                                                                                                                                                                                                                                     |
|                                               | Who makes the first error in the medication event?                                  | List of healthcare providers. There are three different lists for the hospitals, community pharmacies and mental healthcare.                                                                                                                                                                                                                                                                                         |
|                                               | Which ward is this person involved?                                                 | List of wards in a hospital. This question exists only in the form for hospitals.                                                                                                                                                                                                                                                                                                                                    |
|                                               | Did the medication event reach the patient?                                         | <input type="radio"/> Yes<br><input type="radio"/> No                                                                                                                                                                                                                                                                                                                                                                |

|                                     |                                                                           |                                                                                                                                                                                                                                                                                             |
|-------------------------------------|---------------------------------------------------------------------------|---------------------------------------------------------------------------------------------------------------------------------------------------------------------------------------------------------------------------------------------------------------------------------------------|
|                                     | What is the harm of the medication event to the patient?                  | <ul style="list-style-type: none"> <li>○ No discomfort</li> <li>○ Minimal/mild harm</li> <li>○ Seriously temporary harm</li> <li>○ Seriously permanent harm</li> <li>○ Death</li> <li>○ Unknown</li> </ul>                                                                                  |
|                                     | What could be the potential harm to the patient?                          | <ul style="list-style-type: none"> <li>○ Scale from 1 to 5 or unable to estimate</li> </ul>                                                                                                                                                                                                 |
| <b>Questions to notify an alert</b> |                                                                           |                                                                                                                                                                                                                                                                                             |
|                                     | How much is the risk of recurrence?                                       | <ul style="list-style-type: none"> <li>○ Unlikely, less than 1 times a year</li> <li>○ Rare, less than 5 times a year</li> <li>○ Possible within a few months</li> <li>○ Probably within a few days</li> <li>○ Almost sure within a few hours/days</li> <li>○ Unable to estimate</li> </ul> |
|                                     | Can other healthcare providers learn from this reported medication event? | <ul style="list-style-type: none"> <li>○ Scale from 1 to 5 of unable to estimate</li> </ul>                                                                                                                                                                                                 |
|                                     | Is this reported medication event suitable for an alert?                  | <ul style="list-style-type: none"> <li>○ Yes, this is an alert, CMR organisation will contact the informant for detailed information.</li> <li>○ No, this is not an alert.</li> <li>○ Please let the CMR organisation contact the informant.</li> </ul>                                     |
