# Supplementary material
Source: PubMed Central journal article supplement (PMC3957393)
Supplement: amiajnl-2013-001818-s2.pdf [file amiajnl-2013-001818-s2.pdf]

Appendix B: List of 121 Dutch search terms

|                                                                                                                                                                                                                                                                                                                                                                                                                                                                                                                                                            |                                                                                                                                                                                                                                                                                                                                                                                                                                                                                                                                                                 |                                                                                                                                                                                                                                                                                                                                                                                                                                                                       |
|------------------------------------------------------------------------------------------------------------------------------------------------------------------------------------------------------------------------------------------------------------------------------------------------------------------------------------------------------------------------------------------------------------------------------------------------------------------------------------------------------------------------------------------------------------|-----------------------------------------------------------------------------------------------------------------------------------------------------------------------------------------------------------------------------------------------------------------------------------------------------------------------------------------------------------------------------------------------------------------------------------------------------------------------------------------------------------------------------------------------------------------|-----------------------------------------------------------------------------------------------------------------------------------------------------------------------------------------------------------------------------------------------------------------------------------------------------------------------------------------------------------------------------------------------------------------------------------------------------------------------|
| <p>Aangeschreven<br/>Aanklikken<br/>Aanschrijfbuffer<br/>Aanschrijven<br/>accu<br/>Afdruk<br/>AIS<br/>Alarmeerde<br/>Aposys<br/>Automatisch<br/>Barcode<br/>Batch<br/>Beacom<br/>Beeld<br/>Bestand<br/>Bewaking<br/>care O Line<br/>Chipsoft<br/>Code<br/>Compu<br/>Data<br/>Decursus<br/>Diamante<br/>Digitale<br/>Doorgevoerd<br/>Draai<br/>Elektro<br/>EPD<br/>EPIC<br/>EVS<br/>Ezis<br/>Format<br/>Gehangen<br/>Gekoppeld<br/>Genereert<br/>Georderd<br/>Gepri<br/>Geselecteerd<br/>Getipt<br/>Gewist<br/>Glims<br/>GPK<br/>Herhaalservice<br/>HIS</p> | <p>ICU-lijst<br/>In te voeren<br/>Index<br/>Infuus* AND *stand*<br/>Ingesteld<br/>Ingetipt<br/>Ingevoerd<br/>Ingevuld<br/>Inkt<br/>Intranet<br/>Intrazis<br/>Invoer<br/>Inzage instelling<br/>Kea<br/>Keuze<br/>Kiest<br/>Klinikom<br/>Koppel<br/>Lag eruit<br/>Laptop<br/>Lijsten<br/>Medicatiebonnen<br/>Medicatielijst<br/>Medicator<br/>memo<br/>Menu<br/>Metavision<br/>Mira<br/>Mirador<br/>Module<br/>MTR<br/>MVK<br/>Navision<br/>Netwerk<br/>OMO<br/>Op te schonen<br/>Opdrachtenblad<br/>Opgelicht<br/>Opgestart<br/>Order<br/>Overzicht<br/>OZIS</p> | <p>Pc<br/>Perfusor<br/>Pharmacom<br/>Pompstand<br/>Pos<br/>Print<br/>Profile<br/>Programma<br/>Registratie<br/>Rollen<br/>Rugetiket<br/>Scan<br/>Select<br/>Serie<br/>Signaal<br/>Signal<br/>Spuut* AND (*stand* OR *pomp*)<br/>Stopcontact<br/>Storing<br/>Stuurt<br/>System<br/>Taaklijst<br/>Taxe<br/>Typen<br/>Uitdraai<br/>Uitgedraai<br/>Update<br/>Vakje<br/>Vast gelopen<br/>Versie<br/>Voert<br/>Vrije tekst<br/>Waarschuwing<br/>zichtbaar<br/>zinummer</p> |
|------------------------------------------------------------------------------------------------------------------------------------------------------------------------------------------------------------------------------------------------------------------------------------------------------------------------------------------------------------------------------------------------------------------------------------------------------------------------------------------------------------------------------------------------------------|-----------------------------------------------------------------------------------------------------------------------------------------------------------------------------------------------------------------------------------------------------------------------------------------------------------------------------------------------------------------------------------------------------------------------------------------------------------------------------------------------------------------------------------------------------------------|-----------------------------------------------------------------------------------------------------------------------------------------------------------------------------------------------------------------------------------------------------------------------------------------------------------------------------------------------------------------------------------------------------------------------------------------------------------------------|
