# Supplementary material
Source: PubMed Central journal article supplement (PMC3957393)

Appendix C: Flow chart of identification and inclusion of the reports

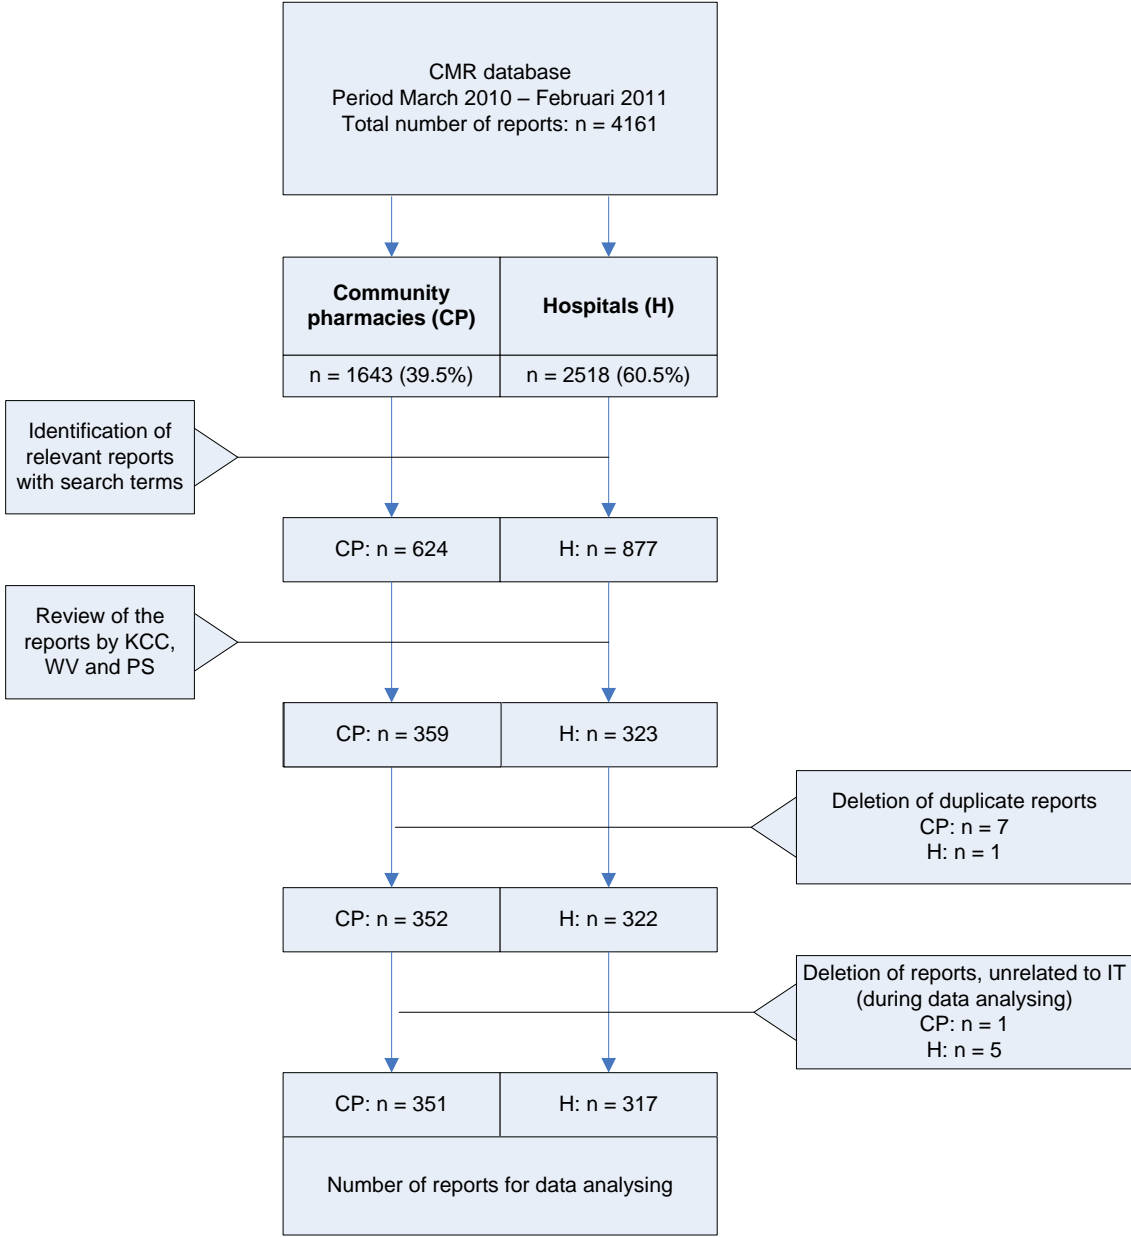

Supplement: amiajnl-2013-001818-s3.pdf [file amiajnl-2013-001818-s3.pdf]
